# Supplementary material for: Fabrication of mesoporous core-shell structured titania microspheres with hollow interiorsElectronic supplementary information (ESI) available: Experimental details, in situ XRD data and thermal evolution of the textural properties of the mesoporous core-shell titania spherical samples. See http://www.rsc.org/suppdata/cc/b2/b212845d/
Source: Royal Society of Chemistry journal article supplement (doi:10.1039/b212845d), 2003-02-17
Supplement: b212845d.doc [file b212845d.doc]

Electronic supplementary information for

“*Fabrication of mesoporous core-shell structured titania microspheres with hollow interiors*”

Chang-Wen Guo, Yong Cao*, Song-Hai Xie, Wei-Lin Dai, Kang-Nian Fan*

*Laboratory of Molecular Catalysis and Innovative Materials, Department of Chemistry, Fudan University, Shanghai 200433, P. R. China*

*Synthesis:* A dilute TiCl4 solution (3 M) was obtained by dissolution of pure reagent grade TiCl4 into specific volume of distilled water under ice-water bath and with vigorous stirring. 15 ml of above TiCl4 solution was carefully dispersed into 50 ml distilled water under ice-water bath and magnetic stirring, followed by the addition of 30 g urea and 5.0 g ammonium sulfate. Finally, 50 ml ethanol was slowly dispersed into above mixture and a transparent solution was obtained. The molar composition of TiCl4: H2O: EtOH: (NH4)2SO4:CO(NH2)2 was 1:86:24:1:46. After stirring for 4 h, a The mixture is transferred into a autoclave of 200 ml capacity, after sealed, the autoclave is heated and maintained at 368 K for 24 hours, and then allowed to cool to ambient temperature. The core-shell structured titania spheroid with well-defined hollow interiors was obtained.

*Characterisation:* The morphology was analysed by scanning electron microscopy (SEM) (Philips-XL-30) and transmission electron microscopy (TEM) (JEOL-2011, operated at 200 kV).The crystalline properties were analysed by X-ray diffraction (XRD) (Bruker D8Advance X-ray diffractometer) methods using CuKa-radiation. The textural structures were measured by N2 adsorption at 77 K (Micromeritics TriStar system).

### Table 1S. The textural properties of the mesoporous core-shell structured titania spherical samples as a function of calcination temperature.

| Calcination temperature (K) | BET surface area  (m2g-1) | Pore Volume  (cm3g-1) | Pore Diameter  D (nm) |
| --- | --- | --- | --- |
| As-synthesized | 266.1 | 0.27 | 3.0 |
| 573 | 179.3 | 0.22 | 3.5 |
| 773 | 139.7 | 0.19 | 4.0 |
| 873 | 69.1 | 0.10 | 5.8 |

**Fig. 1S** *In situ* Powder XRD patterns of as-prepared mesoporous titania spheres recorded as a function of annealing temperature in air flow.

**Fig. 2S**. Influence of the concentration of ammonium sulfate on the mean size of mesoporous core-shell titania spheroid. Synthesis condition: TiCl4-0.3mol/L; urea-5mol/L; ethanol/H2O=1:1(vol.)
